# Supplementary material for: SeqGL Identifies Context-Dependent Binding Signals in Genome-Wide Regulatory Element Maps
Source: PubMed Central journal article supplement (PMC4446265; doi:10.1371/journal.pcbi.1004271), 2015-05-27

### Group171

Group motif 

Known motif  
Hic1 

### Group6

Group motif 

Known motif  
Atoh 

### Group134

Group motif 

Known motif  
Nfic 

### Group107

Group motif 

Known motif  
Oct 

### Group3

Group motif 

Known motif  
Smad 

### Group95

Group motif 

Known motif  
DCE 

### Group184

Group motif 

Known motif  
Pax 

Supplement: pcbi.1004271.s006.pdf [file pcbi.1004271.s006.pdf]
