# Supplementary material for: SeqGL Identifies Context-Dependent Binding Signals in Genome-Wide Regulatory Element Maps
Source: PubMed Central journal article supplement (PMC4446265; doi:10.1371/journal.pcbi.1004271), 2015-05-27

DNase-seq peaks  
(3717)

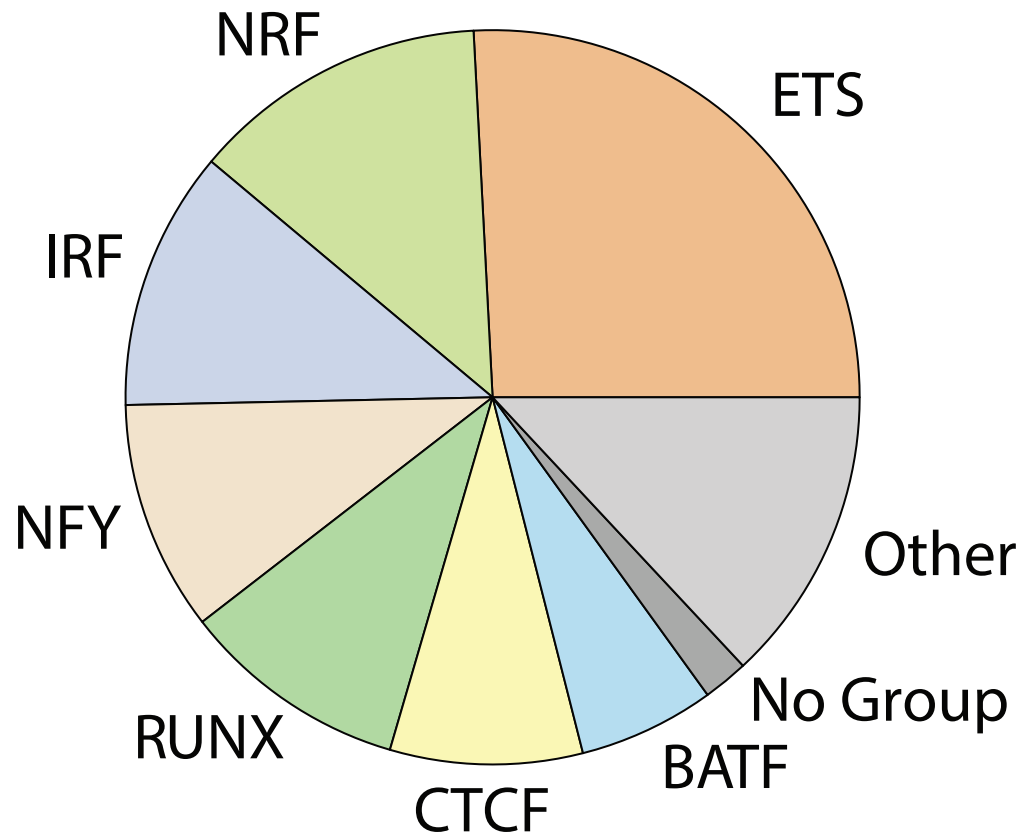

ATAC-seq peaks  
(3717)

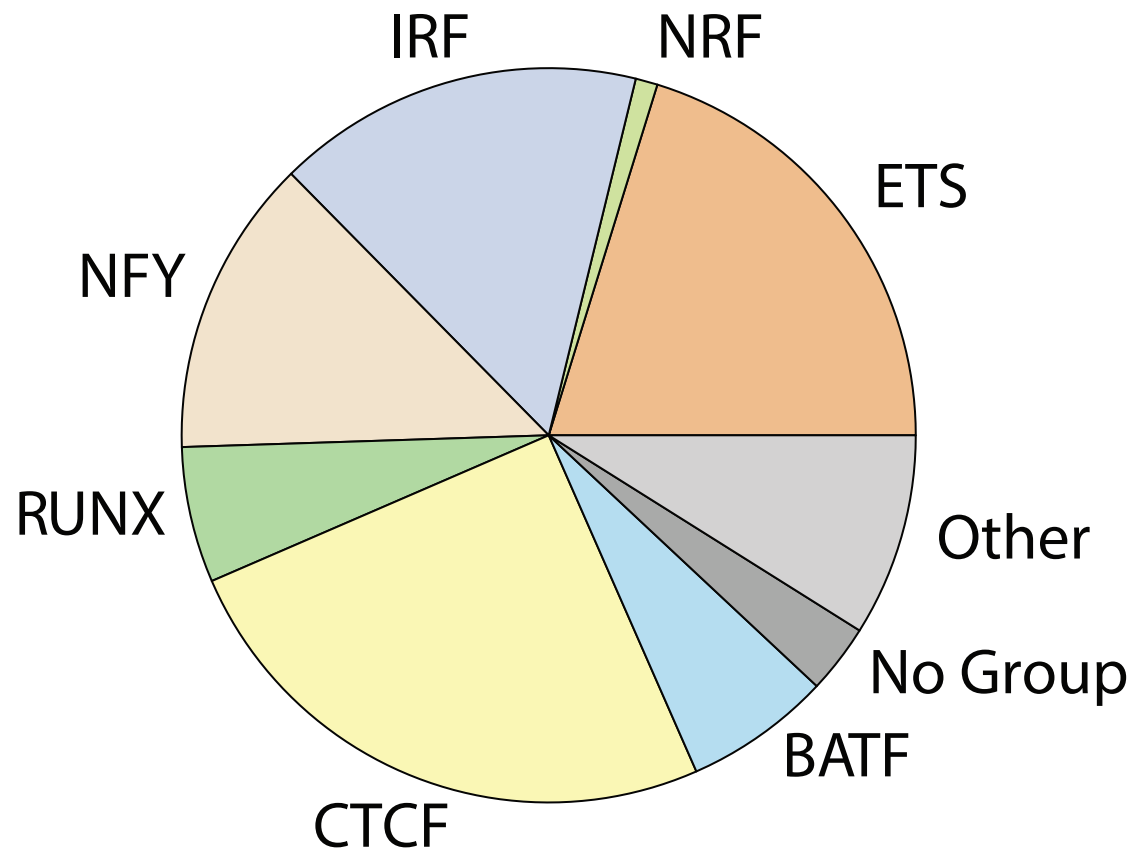

Supplement: pcbi.1004271.s007.pdf [file pcbi.1004271.s007.pdf]
