# Supplementary material for: SeqGL Identifies Context-Dependent Binding Signals in Genome-Wide Regulatory Element Maps
Source: PubMed Central journal article supplement (PMC4446265; doi:10.1371/journal.pcbi.1004271), 2015-05-27

**A**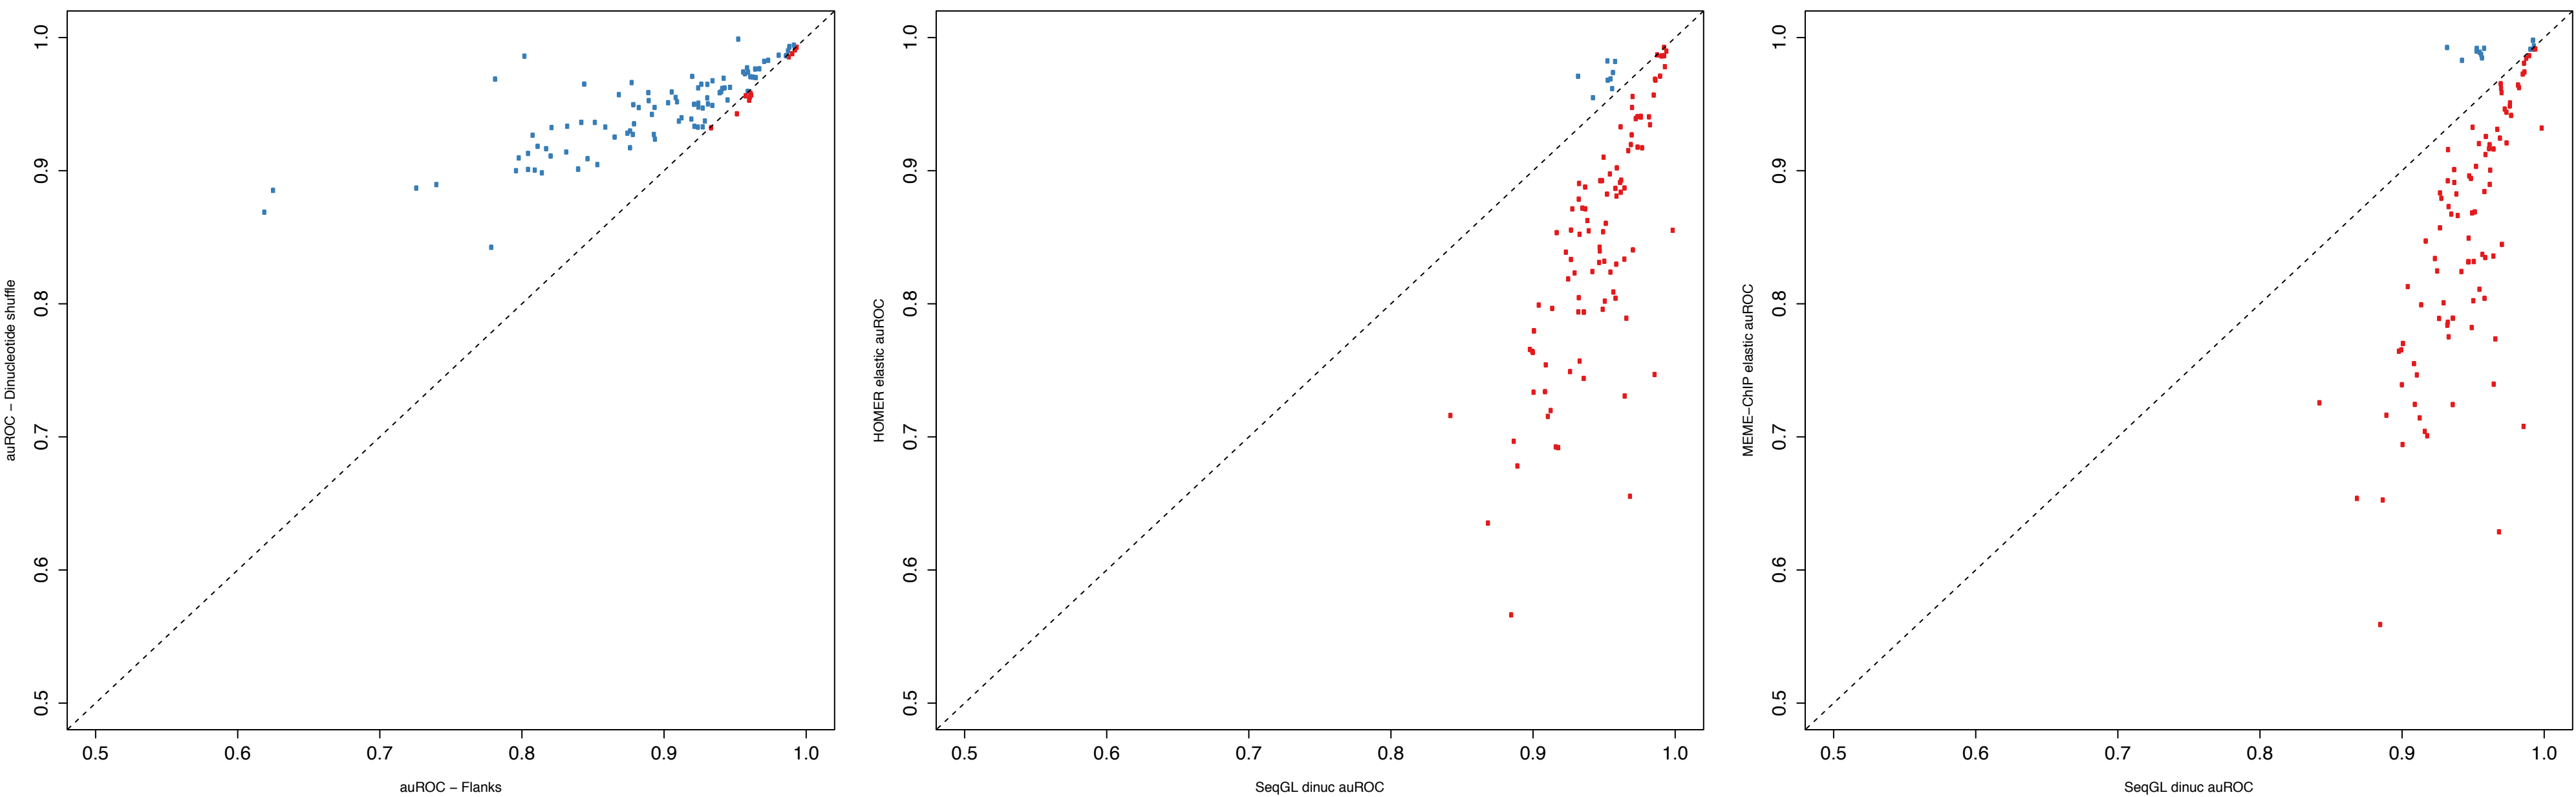**B**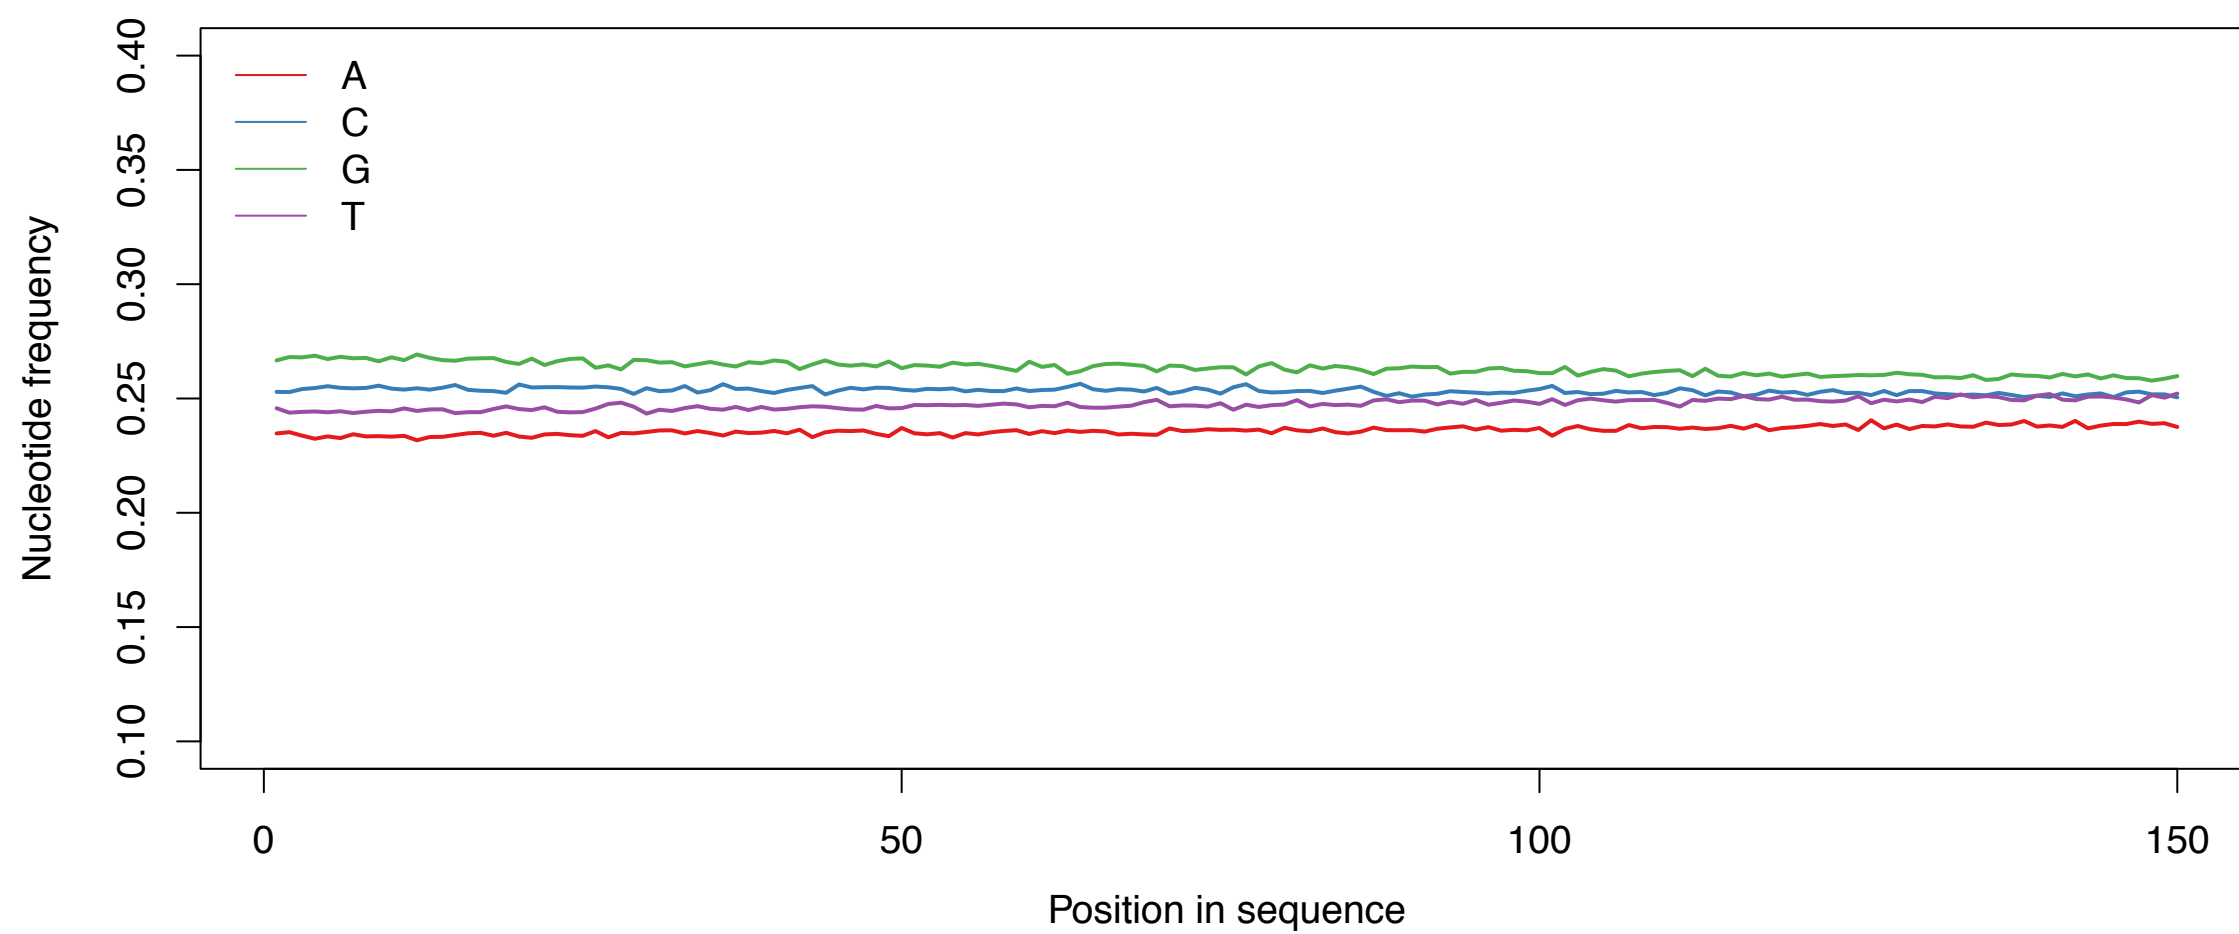

Supplement: pcbi.1004271.s012.pdf [file pcbi.1004271.s012.pdf]
