# Supplementary material for: SeqGL Identifies Context-Dependent Binding Signals in Genome-Wide Regulatory Element Maps
Source: PLoS Comput Biol. 2015 May 27;11(5):e1004271. doi: 10.1371/journal.pcbi.1004271 (PMC4446265; doi:10.1371/journal.pcbi.1004271)
Supplement: S1 Table — (XLSX) [file pcbi.1004271.s013.xlsx]

## Sheet: Sheet1
Cell type	TF ChIP-Seq
GM12878	wgEncodeHaibTfbsGm12878Atf2sc81188V0422111
	wgEncodeHaibTfbsGm12878Atf3Pcr1x
	wgEncodeHaibTfbsGm12878BatfPcr1x
	wgEncodeHaibTfbsGm12878Bcl11aPcr1x
	wgEncodeHaibTfbsGm12878Bcl3V0416101
	wgEncodeHaibTfbsGm12878Bclaf101388V0416101
	wgEncodeHaibTfbsGm12878Cebpbsc150V0422111
	wgEncodeHaibTfbsGm12878Ebf1sc137065Pcr1x
	wgEncodeHaibTfbsGm12878Egr1Pcr2x
	wgEncodeHaibTfbsGm12878Elf1sc631V0416101
	wgEncodeHaibTfbsGm12878Ets1Pcr1x
	wgEncodeHaibTfbsGm12878Foxm1sc502V0422111
	wgEncodeHaibTfbsGm12878GabpPcr2x
	wgEncodeHaibTfbsGm12878Irf4sc6059Pcr1x
	wgEncodeHaibTfbsGm12878Mef2aPcr1x
	wgEncodeHaibTfbsGm12878Mef2csc13268V0416101
	wgEncodeHaibTfbsGm12878Mta3sc81325V0422111
	wgEncodeHaibTfbsGm12878Nfatc1sc17834V0422111
	wgEncodeHaibTfbsGm12878Nficsc81335V0422111
	wgEncodeHaibTfbsGm12878NrsfPcr1x
	wgEncodeHaibTfbsGm12878P300Pcr1x
	wgEncodeHaibTfbsGm12878Pax5c20Pcr1x
	wgEncodeHaibTfbsGm12878Pax5n19Pcr1x
	wgEncodeHaibTfbsGm12878Pbx3Pcr1x
	wgEncodeHaibTfbsGm12878Pmlsc71910V0422111
	wgEncodeHaibTfbsGm12878Pou2f2Pcr1x
	wgEncodeHaibTfbsGm12878Pu1Pcr1x
	wgEncodeHaibTfbsGm12878Rad21V0416101
	wgEncodeHaibTfbsGm12878Runx3sc101553V0422111
	wgEncodeHaibTfbsGm12878RxraPcr1x
	wgEncodeHaibTfbsGm12878Six5Pcr1x
	wgEncodeHaibTfbsGm12878Sp1Pcr1x
	wgEncodeHaibTfbsGm12878SrfPcr2x
	wgEncodeHaibTfbsGm12878Stat5asc74442V0422111
	wgEncodeHaibTfbsGm12878Taf1Pcr1x
	wgEncodeHaibTfbsGm12878Tcf12Pcr1x
	wgEncodeHaibTfbsGm12878Tcf3Pcr1x
	wgEncodeHaibTfbsGm12878Usf1Pcr2x
	wgEncodeHaibTfbsGm12878Yy1sc281Pcr1x
	wgEncodeHaibTfbsGm12878Zbtb33Pcr1x
	wgEncodeHaibTfbsGm12878Zeb1sc25388V0416102
	wgEncodeOpenChromChipGm12878Cmyc
	wgEncodeOpenChromChipGm12878Ctcf
	wgEncodeSydhTfbsGm12878Bhlhe40cIggmus
	wgEncodeSydhTfbsGm12878Brca1a300Iggmus
	wgEncodeSydhTfbsGm12878CfosStd
	wgEncodeSydhTfbsGm12878Chd1a301218aIggmus
	wgEncodeSydhTfbsGm12878Chd2ab68301Iggmus
	wgEncodeSydhTfbsGm12878Corestsc30189Iggmus
	wgEncodeSydhTfbsGm12878Ctcfsc15914c20Std
	wgEncodeSydhTfbsGm12878E2f4Iggmus
	wgEncodeSydhTfbsGm12878Ebf1sc137065Std
	wgEncodeSydhTfbsGm12878Elk112771Iggmus
	wgEncodeSydhTfbsGm12878Ikzf1iknuclaStd
	wgEncodeSydhTfbsGm12878JundStd
	wgEncodeSydhTfbsGm12878MaxIggmus
	wgEncodeSydhTfbsGm12878Mazab85725Iggmus
	wgEncodeSydhTfbsGm12878Mxi1Iggmus
	wgEncodeSydhTfbsGm12878Nfe2sc22827Std
	wgEncodeSydhTfbsGm12878NfkbTnfaIggrab
	wgEncodeSydhTfbsGm12878NfyaIggmus
	wgEncodeSydhTfbsGm12878NfybIggmus
	wgEncodeSydhTfbsGm12878Nrf1Iggmus
	wgEncodeSydhTfbsGm12878P300bStd
	wgEncodeSydhTfbsGm12878P300Iggmus
	wgEncodeSydhTfbsGm12878Rad21Iggrab
	wgEncodeSydhTfbsGm12878Rfx5200401194Iggmus
	wgEncodeSydhTfbsGm12878Sin3anb6001263Iggmus
	wgEncodeSydhTfbsGm12878Smc3ab9263Iggmus
	wgEncodeSydhTfbsGm12878Stat1Std
	wgEncodeSydhTfbsGm12878Stat3Iggmus
	wgEncodeSydhTfbsGm12878Tblr1ab24550Iggmus
	wgEncodeSydhTfbsGm12878TbpIggmus
	wgEncodeSydhTfbsGm12878Tr4Std
	wgEncodeSydhTfbsGm12878Usf2Iggmus
	wgEncodeSydhTfbsGm12878WhipIggmus
	wgEncodeSydhTfbsGm12878Yy1Std
	wgEncodeSydhTfbsGm12878Znf143166181apStd
	wgEncodeSydhTfbsGm12878Zzz3Std
	wgEncodeUwTfbsGm12878CtcfStd
H1-hESC	wgEncodeHaibTfbsH1hescAtf3V0416102
	wgEncodeHaibTfbsH1hescBcl11aPcr1x
	wgEncodeHaibTfbsH1hescCtcfsc5916V0416102
	wgEncodeHaibTfbsH1hescEgr1V0416102
	wgEncodeHaibTfbsH1hescGabpPcr1x
	wgEncodeHaibTfbsH1hescHdac2sc6296V0416102
	wgEncodeHaibTfbsH1hescJundV0416102
	wgEncodeHaibTfbsH1hescNanogsc33759V0416102
	wgEncodeHaibTfbsH1hescNrsfV0416102
	wgEncodeHaibTfbsH1hescP300Pcr1x
	wgEncodeHaibTfbsH1hescP300V0416102
	wgEncodeHaibTfbsH1hescPou5f1sc9081V0416102
	wgEncodeHaibTfbsH1hescRad21V0416102
	wgEncodeHaibTfbsH1hescRxraV0416102
	wgEncodeHaibTfbsH1hescSin3ak20Pcr1x
	wgEncodeHaibTfbsH1hescSix5Pcr1x
	wgEncodeHaibTfbsH1hescSp1Pcr1x
	wgEncodeHaibTfbsH1hescSrfPcr1x
	wgEncodeHaibTfbsH1hescTaf1V0416102
	wgEncodeHaibTfbsH1hescTcf12Pcr1x
	wgEncodeHaibTfbsH1hescUsf1Pcr1x
	wgEncodeSydhTfbsH1hescCtbp2Ucd
	wgEncodeSydhTfbsH1hescMaxUcd
	wgEncodeSydhTfbsH1hescNrf1Iggrab
	wgEncodeSydhTfbsH1hescSuz12Ucd
